# Supplementary material for: An ultra-soft conductive elastomer for multifunctional tactile sensors with high range and sensitivity
Source: Royal Society of Chemistry journal article supplement (doi:10.1039/d3mh02074f), 2024-01-01
Supplement: d3mh02074f1.pdf [file d3mh02074f1.pdf]

ARTICLE

Supporting Information

**An Ultra-Soft Conductive Elastomer for Multifunctional Tactile Sensors with High Range and Sensitivity.**

Ao Yin<sup>ab</sup>, Ruiguang Chen<sup>ab</sup>, Rui Yin<sup>ab</sup>, Shiqiang Zhou<sup>ab</sup>, Yang Ye<sup>ab</sup>, Yuxin Wang<sup>ab</sup>, Peike Wang<sup>ab</sup>,  
Xue Qi<sup>ab</sup>, Haipeng Liu<sup>ab</sup>, Jiang Liu<sup>ab</sup>, Suzhu Yu<sup>ab\*</sup> and Jun Wei<sup>abc\*</sup>

<sup>a</sup>Shenzhen Key Laboratory of Flexible Printed Electronics Technology, Harbin Institute of  
Technology (Shenzhen), Shenzhen 518055, China

<sup>b</sup>School of Materials Science and Engineering, Harbin Institute of Technology (Shenzhen),  
Shenzhen 518055, China

<sup>c</sup>State Key Laboratory of Advanced Welding and Joining, Harbin Institute of Technology,  
Harbin 150001, China

\*Corresponding author: Suzhu Yu, Jun Wei, **E-mail:** szyu@hit.edu.cn, junwei@hit.edu.cn

## ARTICLE

19

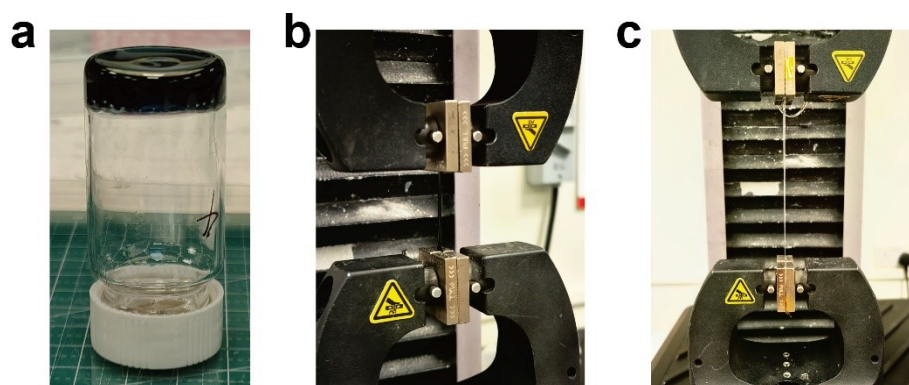

20

21 **Figure S1.** (a) Blended solution with 18% content PVA after 15 min. The photo of the tensile test using MST-42 of  
22 (b) PM2 and (c) the dielectric layer.

23

## ARTICLE

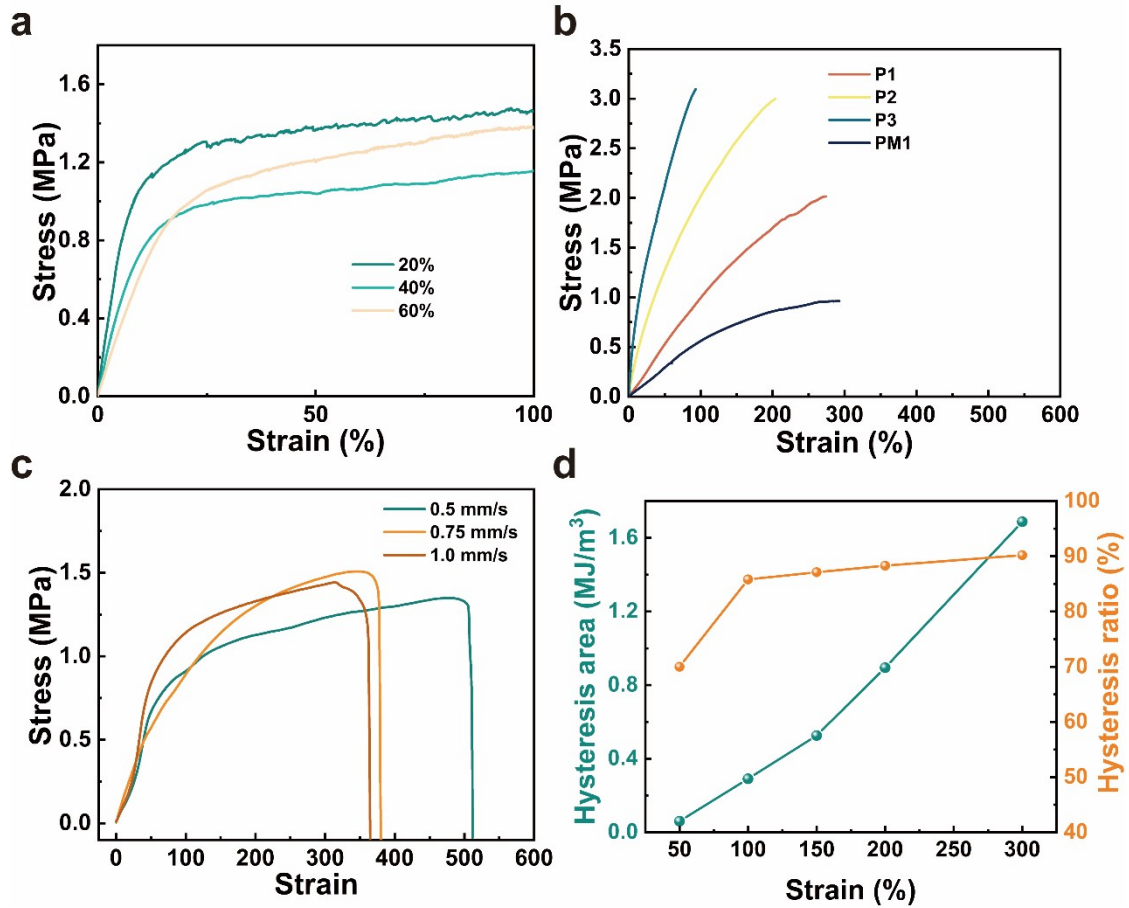

**Figure S2.** Stress-strain curves of (a) dielectric layer with different content of ILs and (b) SCCFs with different content of PEDOT:PSS and (c) PM2 sample under different deformation rates. (d) Plot of hysteresis area and hysteresis ratio versus strain of PM2 in the strain range from 50% to 300% at a deformation rate of 0.2 mm/s.

## ARTICLE

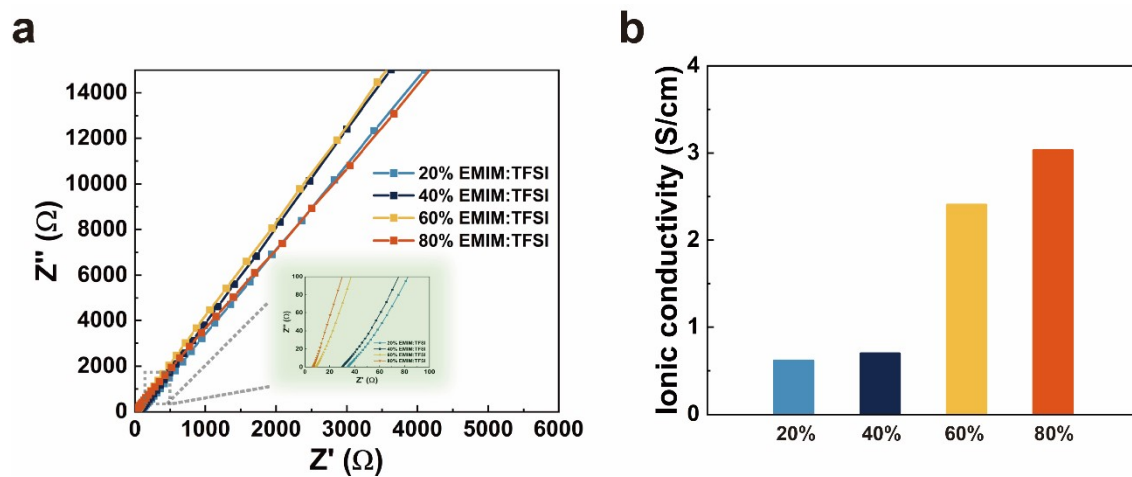

**Figure S3.** (a) AC impedance spectra of the dielectric layer with different IL content. (b) The calculated conductivity of the dielectric layer with different IL content.

## ARTICLE

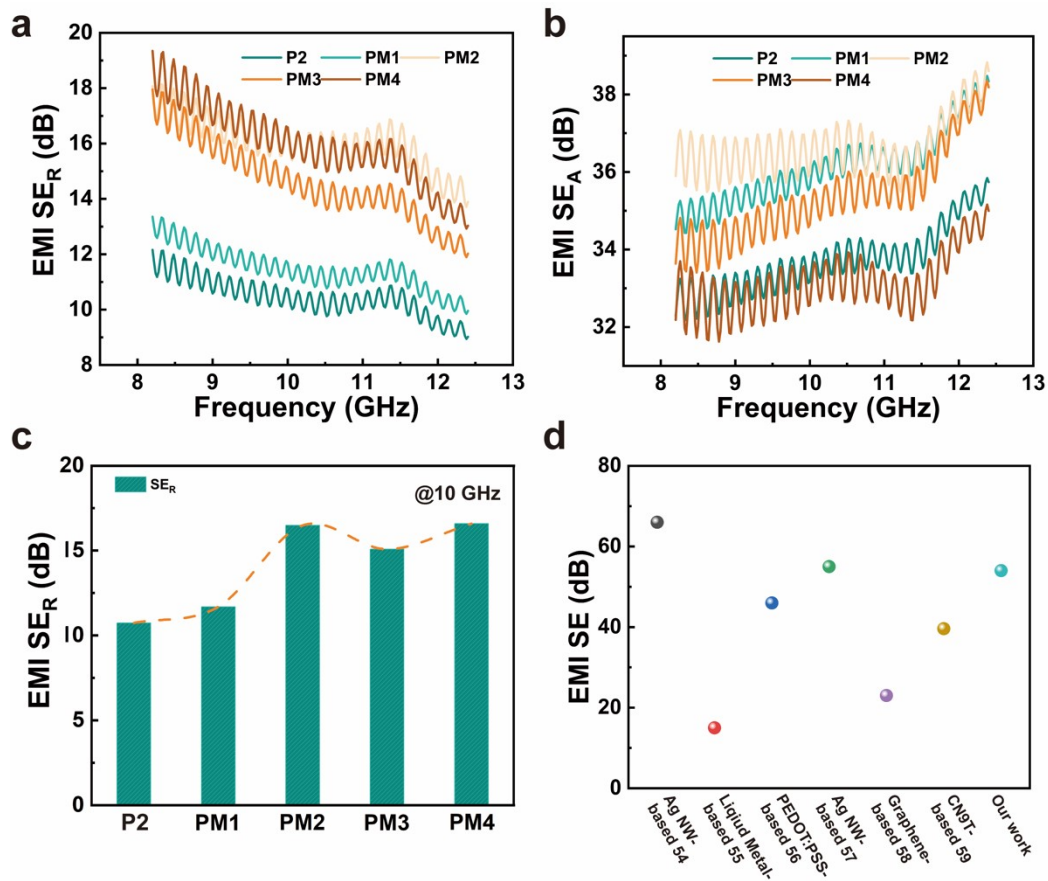

**Figure S4.** (a) EMI  $SE_R$  and (b) EMI  $SE_A$  of SCCFs with different Mxene content at 8.2 to 12.4 Hz. (c) EMI  $SE_R$  of SCCF with different Mxene content at 10GHz. (d) Comparison of EMI and other flexible conductive composites for wearable electronics.

## ARTICLE

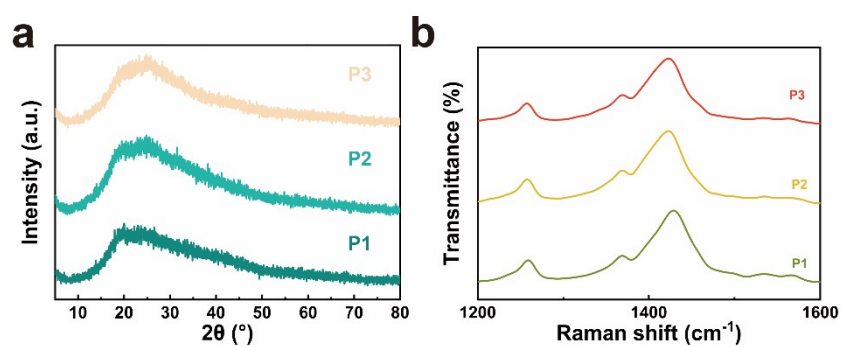

**Figure S5.** (a) XRD patterns and (b) Raman spectra of the SCCF with different content of PEDOT:PSS.

## ARTICLE

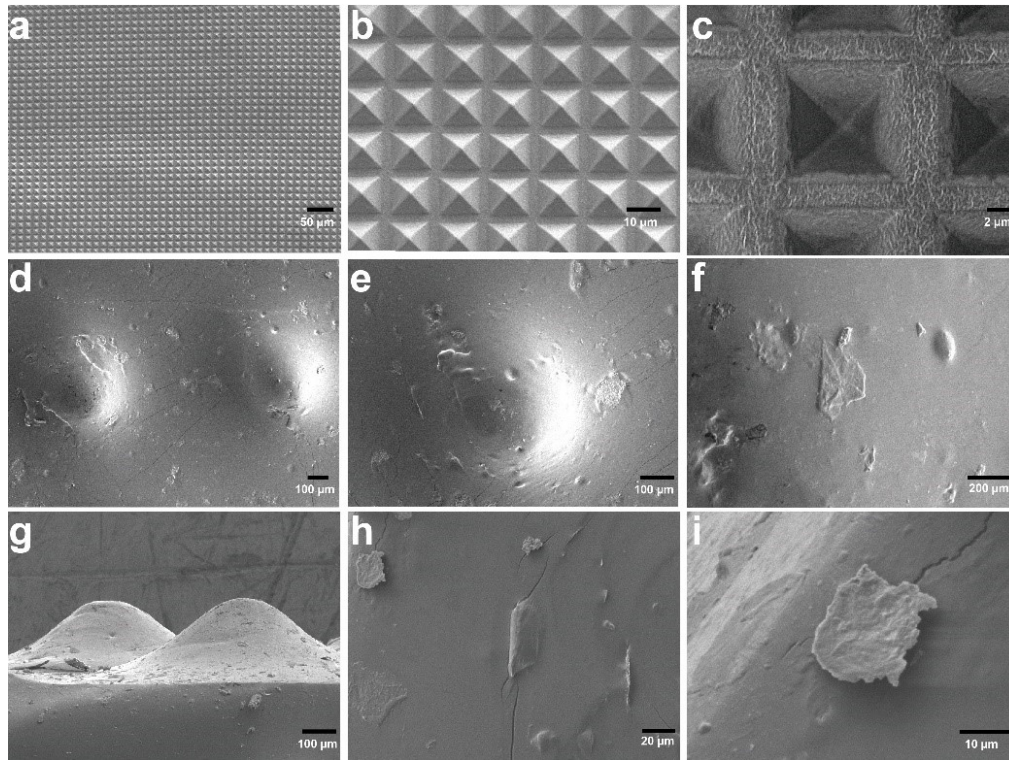

**Figure S6.** SEM image of (a-c) the pyramid structure of the dielectric layer and (d-f) the SCCFs electrode (PM2) at different magnifications. (g-i) The cross-section image of SCCFs electrode (PM2) at different magnifications.

## ARTICLE

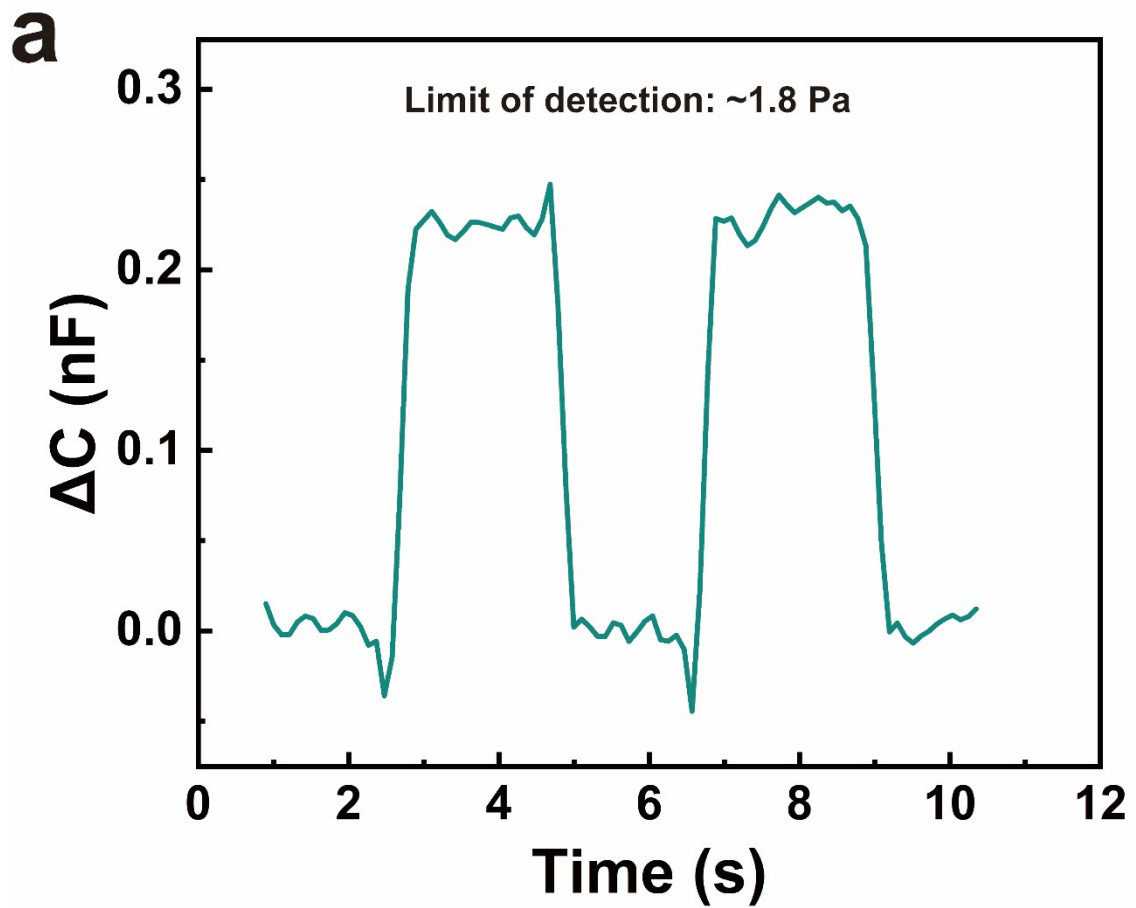

46

47 **Figure S7.** (a) Limitation of detection (LOD) of ~1.8 Pa of the SCCF-based sensor.

48

## ARTICLE

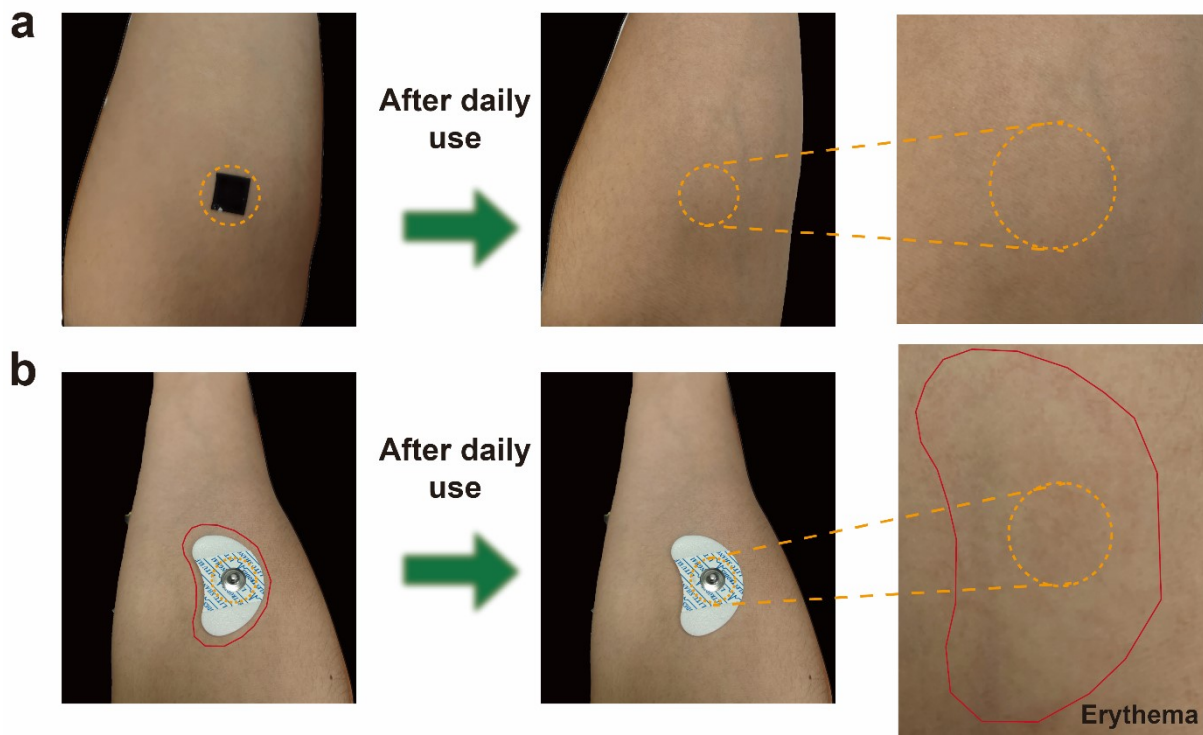

**Figure S8.** Images of a SCCF attached to the forearm. (a) It has no significant inflammation after one day. (b) After 1 hour of wearing the commercial gel electrodes, the skin has obvious erythema.

## ARTICLE

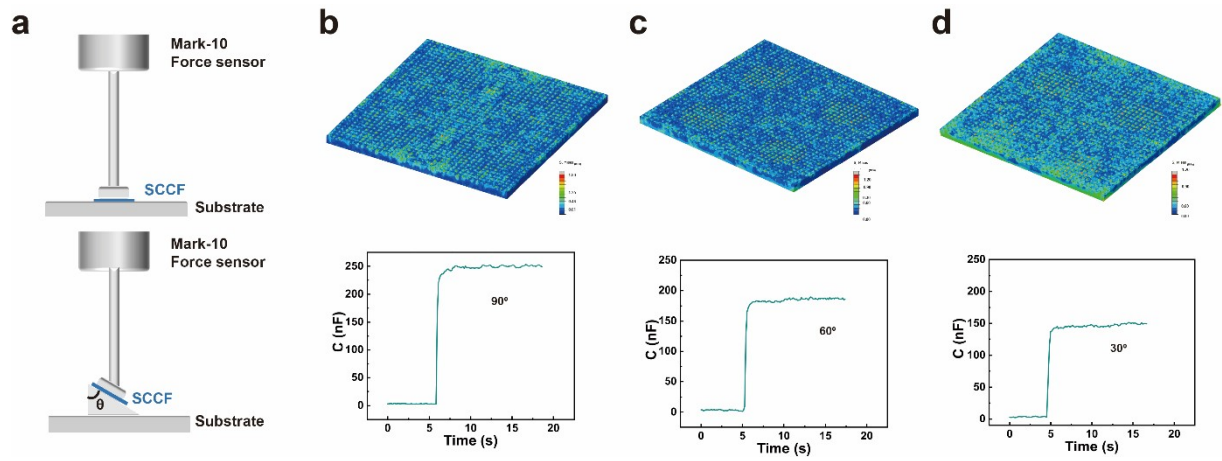

**Figure S9.** Multidirectional force detection of the SSCF-based sensor. (a) Schematic of the multifunctional force measurement. The simulated stress distribution of the pyramid structure dielectric layer and measured capacitance under (b)  $90^\circ$ , (c)  $60^\circ$ , and (d)  $30^\circ$ .

## ARTICLE

**Table S1** The details of various SCCFs with different PEDOT:PSS and MXene mass ratios.

| Sample | SMDES         |               |                    | Polymer solution |                 | PH1000<br>(1.3wt%)/g | MXene/mg |
|--------|---------------|---------------|--------------------|------------------|-----------------|----------------------|----------|
|        | $\beta$ -CD/g | citric acid/g | H <sub>2</sub> O/g | 10% PVA/g        | 25% GA/ $\mu$ L |                      |          |
| P1     | 0.59          | 1             | 5                  | 2                | 5               | 6                    | 0        |
| P2     | 0.59          | 1             | 5                  | 2                | 5               | 13                   | 0        |
| P3     | 0.295         | 0.5           | 2.5                | 1                | 2.5             | 13                   | 0        |
| PM1    | 0.59          | 1             | 5                  | 2                | 5               | 13                   | 12       |
| PM2    | 0.59          | 1             | 5                  | 2                | 5               | 13                   | 34       |
| PM3    | 0.59          | 1             | 5                  | 2                | 5               | 13                   | 85       |
| PM4    | 0.59          | 1             | 5                  | 2                | 5               | 13                   | 118      |
